# Supplementary material
Source: Springer Nature journal article supplement (https://www.springermedizin.de/resource/supplementary/12936_2011_1852_MOESM1_ESM.pdf/9541920)
Supplement: MOESM1 [file 9541920]

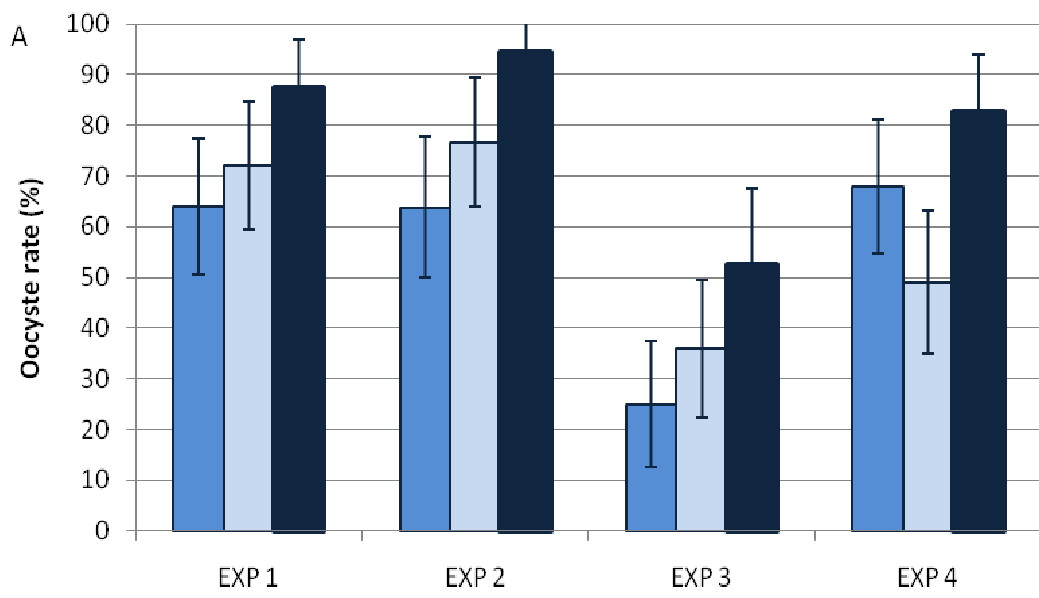

■ *An. arabiensis*  
 ■ *An. gambiae M*  
 ■ *An. gambiae S*

|                              |             |    |    |              |    |    |             |    |    |              |    |    |
|------------------------------|-------------|----|----|--------------|----|----|-------------|----|----|--------------|----|----|
| Nb. of studied mosquitoes    | 50          | 50 | 48 | 47           | 43 | 36 | 48          | 50 | 42 | 50           | 49 | 46 |
| Nb. of positive mosquitoes   | 32          | 36 | 42 | 30           | 33 | 34 | 12          | 18 | 22 | 34           | 24 | 38 |
| Chi <sup>2</sup> and P value | 7.3 (0.026) |    |    | 10.8 (0.005) |    |    | 7.2 (0.027) |    |    | 12.1 (0.002) |    |    |

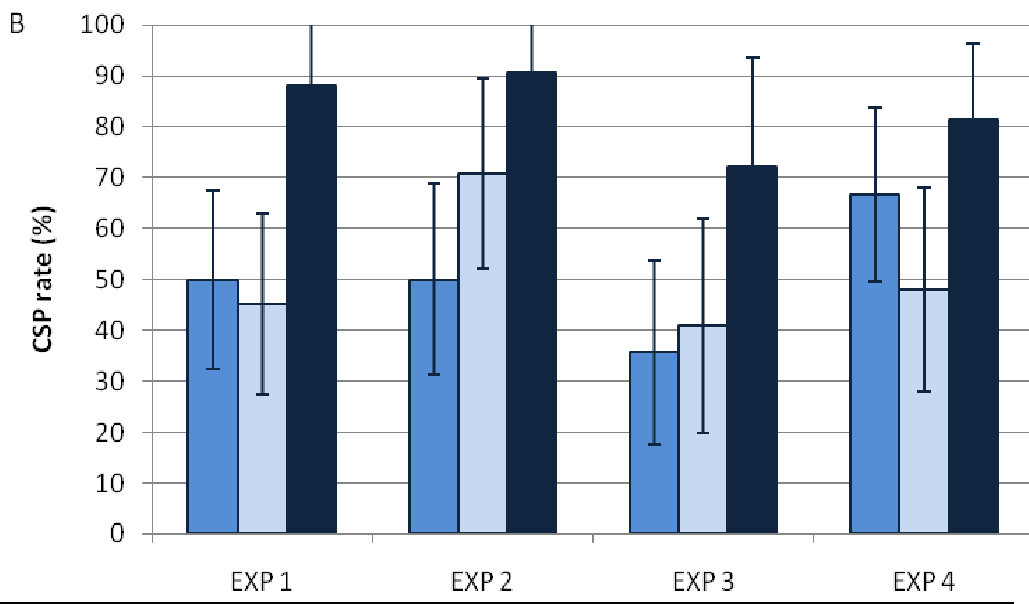

■ *An. arabiensis*  
 ■ *An. gambiae M*  
 ■ *An. gambiae S*

|                              |              |    |    |            |    |    |            |    |    |            |    |    |
|------------------------------|--------------|----|----|------------|----|----|------------|----|----|------------|----|----|
| Nb. of studied mosquitoes    | 32           | 31 | 25 | 28         | 24 | 21 | 28         | 22 | 18 | 30         | 25 | 27 |
| Nb. of positive mosquitoes   | 16           | 14 | 22 | 14         | 17 | 19 | 10         | 9  | 13 | 20         | 12 | 22 |
| Chi <sup>2</sup> and P value | 12.2 (0.002) |    |    | 9.2 (0.01) |    |    | 6.4 (0.04) |    |    | 6.5 (0.04) |    |    |
